1 **Discovering disease-causing pathogens in resource-scarce Southeast Asia using a global**  
2 **metagenomic pathogen monitoring system**

3  
4 Jennifer A. Bohl<sup>1</sup>, Sreyngim Lay<sup>2,3</sup>, Sophana Chea<sup>2,3</sup>, Vida Ahyong<sup>4</sup>, Daniel M. Parker<sup>5</sup>, Shannon  
5 Gallagher<sup>6</sup>, Jonathan Fintzi<sup>6</sup>, Somnang Man<sup>2,3</sup>, Aiyana Ponce<sup>1</sup>, Sokunthea Sreng<sup>2,3</sup>, Dara Kong<sup>2,3</sup>,  
6 Fabiano Oliveira<sup>1</sup>, Katrina Kalantar<sup>8</sup>, Michelle Tan<sup>4</sup>, Liz Fahsbender<sup>8</sup>, Jonathan Sheu<sup>8</sup>, Norma Neff<sup>4</sup>,  
7 Angela M. Detweiler<sup>4</sup>, Sokna Ly<sup>2,3</sup>, Rathanak Sath<sup>2,9</sup>, Chea Huch<sup>3</sup>, Hok Kry<sup>9</sup>, Rithea Leang<sup>3</sup>, Rekol Huy<sup>3</sup>,  
8 Chanthap Lon<sup>2,3</sup>, Cristina M. Tato<sup>4</sup>, Joseph L. DeRisi<sup>\*4,10</sup>, Jessica E. Manning<sup>1,2</sup>

9 1 - Laboratory of Malaria and Vector Research, National Institute of Allergy and Infectious Diseases,  
10 National Institutes of Health, Bethesda, Maryland, USA

11 2 – International Center of Excellence in Research, National Institute of Allergy and Infectious Diseases,  
12 National Institutes of Health, Phnom Penh, Cambodia

13 3 – National Center for Parasitology, Entomology, and Malaria Control, Ministry of Health, Phnom Penh,  
14 Cambodia

15 4 – Chan Zuckerberg Biohub, San Francisco, California, USA

16 5 – University of California, Irvine, California USA

17 6– Biostatistics Research Branch, National Institute of Allergy and Infectious Diseases, National Institutes  
18 of Health, Bethesda, Maryland, USA

19 8 – Chan Zuckerberg Initiative, Redwood City, California, USA

20 9 – Kampong Speu District Referral Hospital, Chbar Mon, Cambodia

21 10 – University of California, San Francisco, California USA

22 \*Corresponding Author: Jennifer A. Bohl

23  
24 **Email:** bohlja@nih.gov

25  
26 **Author Contributions:** J.A.B, J.E.M, D.M.P, V.A., S.C., S.L., and J.L.D. designed the research; J.A.B,  
27 S.L., S.P., V.A., D.P., S.M., A.P., S.S., D.K., F.O., S.L., R.S., C.H., H.K., R.L., R.H., C.L. and J.L.D.  
28 performed research; J.A.B, S.L., S.C., V.A., J.E.M., D.A., S.G., J.F., K.K., M.T., L.F., J.S., N.N., A.D.,  
29 C.T., J.L.D., contributed analytical tools and analyzed the data, and J.A.B, J.E.M, and J.L.D wrote the  
30 paper. All authors report no potential conflicts of interest.

31  
32 **Competing Interest Statement:** We have no competing interests.

33  
34 **Classification:** Biological Sciences; microbiology; medical sciences

35

36 **Keywords:** metagenomics; vector-borne disease; next generation sequencing; surveillance; Southeast  
37 Asia

38  
39 **Significance Statement:**

40  
41 Metagenomic pathogen sequencing offers an unbiased approach to characterizing febrile illness. In  
42 resource-scarce settings with high biodiversity, it is critical to identify disease-causing pathogens in order  
43 to understand burden and to prioritize efforts for control. Here, mNGS characterization of the pathogen  
44 landscape in Cambodia revealed diverse vector-borne and zoonotic pathogens irrespective of age and  
45 gender as risk factors. Identification of key pathogens led to changes in national program surveillance.  
46 This study provides a recent 'real world' example for the use of mNGS surveillance in both identifying  
47 diverse microbial landscapes and detecting outbreaks of vector-borne, zoonotic, and other emerging  
48 pathogens in resource-scarce settings.

49  
50 **This PDF file includes:**

51 Main Text  
52 Figures 1 to 4  
53 Tables 1 to 2  
54

55 **Abstract**

56 Understanding the regional pathogen landscape and surveillance of emerging pathogens is key to  
57 mitigating epidemics. Challenges lie in resource-scarce settings, where outbreaks are likely to emerge,  
58 but where laboratory diagnostics and bioinformatics capacity are limited. Using unbiased metagenomic  
59 next generation sequencing (mNGS), we identified a variety of vector-borne, zoonotic and emerging  
60 pathogens responsible for undifferentiated fevers in a peri-urban population in Cambodia. From March  
61 2019 to October 2020, we enrolled 473 febrile patients aged 6 months to 65 years of age presenting to a  
62 large peri-urban hospital in Cambodia. We collected sera and prepared sequencing libraries from  
63 extracted pathogen RNA for unbiased metagenomic sequencing and subsequent bioinformatic analysis  
64 on the global cloud-based platform, IDseq. We employed multivariate Bayesian models to evaluate  
65 specific pathogen risk causing undifferentiated febrile illness. mNGS identified vector-borne pathogens as  
66 the largest clinical category with dengue virus (124/489) as the most abundant pathogen.  
67 Underappreciated zoonotic pathogens such as *Plasmodium knowlesi*, leptospirosis, and co-infecting HIV  
68 were also detected. Early detection of chikungunya virus presaged a larger national outbreak of more  
69 than 6,000 cases. Pathogen-agnostic mNGS investigation of febrile persons in resource-scarce  
70 Southeast Asia is feasible and revealing of a diverse pathogen landscape. Coordinated and ongoing  
71 unbiased mNGS pathogen surveillance can better identify the breadth of endemic, zoonotic or emerging  
72 pathogens and deployment of rapid public health response.

73

74 **Clinical Trial Numbers:** NCT04034264 and NCT03534245.

75

76 **Significance Statement**

77 Public health authorities recently advocated for global expansion of sequencing capacity worldwide;  
78 however, the importance of genomics-based surveillance to detect emerging pathogens or variants in  
79 resource-limited settings is paramount, especially in a populous, biodiverse Southeast Asia. From 2019  
80 to 2020, pathogen metagenomic next generation sequencing (mNGS) of febrile patients in Cambodia  
81 identified several vector-borne and zoonotic pathogens, both common and underappreciated, and  
82 resulted in a variety of actionable health interventions. Understanding these pathogen discoveries, and  
83 the attendant challenges of mNGS in these outbreak-prone settings, is critical for today's global society  
84 and decision-makers in order to implement sequencing-based pathogen or variant detection.

85

86

87 **Main Text**

88 **Introduction**

89 A global pathogen surveillance network can best identify emerging and underlying pathogens if it employs  
90 pathogen-agnostic detection methods, such as metagenomic next-generation sequencing (mNGS), and is  
91 decentralized to include low-resource settings that are often biodiversity hotspots at increased risk for  
92 disease outbreaks (1–3). Lack of diagnostics in these areas makes undifferentiated febrile illnesses  
93 difficult to diagnose and treat, much less confirm and report for global public health awareness. In  
94 Southeast Asia where a quarter of the world’s population resides, rapid but heterogeneous economic  
95 development juxtaposes low-resource and high-resource areas, causing high cross-border mobility of  
96 persons for economic opportunities. In Cambodia and Laos, laboratory testing for non-malarial fevers is  
97 limited, particularly in rural and peri-urban areas where simple diagnostics like dengue rapid tests may not  
98 be available (4). In many instances, healthcare providers make diagnoses and empiric treatment  
99 decisions based on symptoms so the responsible pathogen is rarely identified.

100 Syndromic diagnosis is an epidemiological pitfall in Southeast Asia because the true scope of pathogen  
101 diversity remains poorly defined. From limited decade-old surveillance data of febrile Cambodians,  
102 *Plasmodium* infections made up more than 50% of the responsible pathogens followed by  
103 pathogenic *Leptospira* (9.4%), influenza virus (8.9%), and dengue virus (DENV)(6.3%) (5). In a separate  
104 serosurvey, one third of febrile Cambodian patients had antibodies to rickettsiae that cause scrub typhus  
105 (via chiggers containing *Orientia tsutsugamushi*), endemic typhus (via rat fleas *Xenopsylla cheopis*  
106 carrying *Rickettsia typhi*), spotted fever (via ticks carrying *Rickettsia rickettsii*), and murine typhus (via cat  
107 fleas *Ctenocephalides felis* carrying *Rickettsia felis*), which some speculate may be the next mosquito-  
108 borne outbreak (6, 7). Entomological studies of field-collected ticks, mosquitos and fleas in Cambodia  
109 have revealed high biodiversity of potential disease-carrying vectors including underappreciated  
110 *Bartonella spp* (8, 9). Other serosurveys of bats, domestic pigs, and birds in Cambodia demonstrated the  
111 presence of antibodies to other zoonotic viruses including Nipah virus, hepatitis E, Japanese encephalitis  
112 virus, and West Nile virus with potential for spillover into the human population (10–12).

113 In these settings of high pathogen diversity, monitoring with pathogen-agnostic tools, such as mNGS, is  
114 ideal but typically not available in-country to provide results within an actionable timeframe. Examples of

115 mNGS identifying pathogens in patients are limited to clinical research programs in developed countries  
116 (13–15). However, it is clear that broadly applied and timely mNGS in any population can lead to a better  
117 understanding of the overall pathogen landscape, which has direct implications for disease containment  
118 methods in the event of an outbreak (16, 17). Here, as an initial step in a low-resource setting in Asia, we  
119 describe implementation of mNGS serosurveillance, using an open-source cloud-based bioinformatics  
120 tool, to identify pathogens in sera from febrile individuals in peri-urban Cambodia.

121

## 122 **Results**

### 123 **Clinical characteristics of febrile participants in Cambodia**

124 From March 2019 to October 2020, a total of 487 patients presenting with fever were screened, enrolled  
125 and contributed sera for mNGS (377 patients in hospital-based cohort and 110 in community-based  
126 cohort) (Figure 1). Demographic and clinical characteristics are detailed in Table 1; notably, the  
127 participants are young with the median age in the hospital cohort at 10 years (IQR 12), and 6 years (IQR  
128 4) in the community cohort. The predominant symptom reported in both studies was headache 52.4%  
129 (256/487). Of the adults, 67.7% (61/90) were employed in non-agricultural settings while the remainder  
130 were farmers or unemployed. In only the hospital cohort, approximately half of participants reported insect  
131 exposure, primarily mosquitos (211/376). Nearly three-quarters of participants reported animal exposure  
132 (275/376). The most common animal exposures included dogs, cats, and chickens, with some rare  
133 reports of exposure to pigs and horses.

134

135 **Figure 1.**

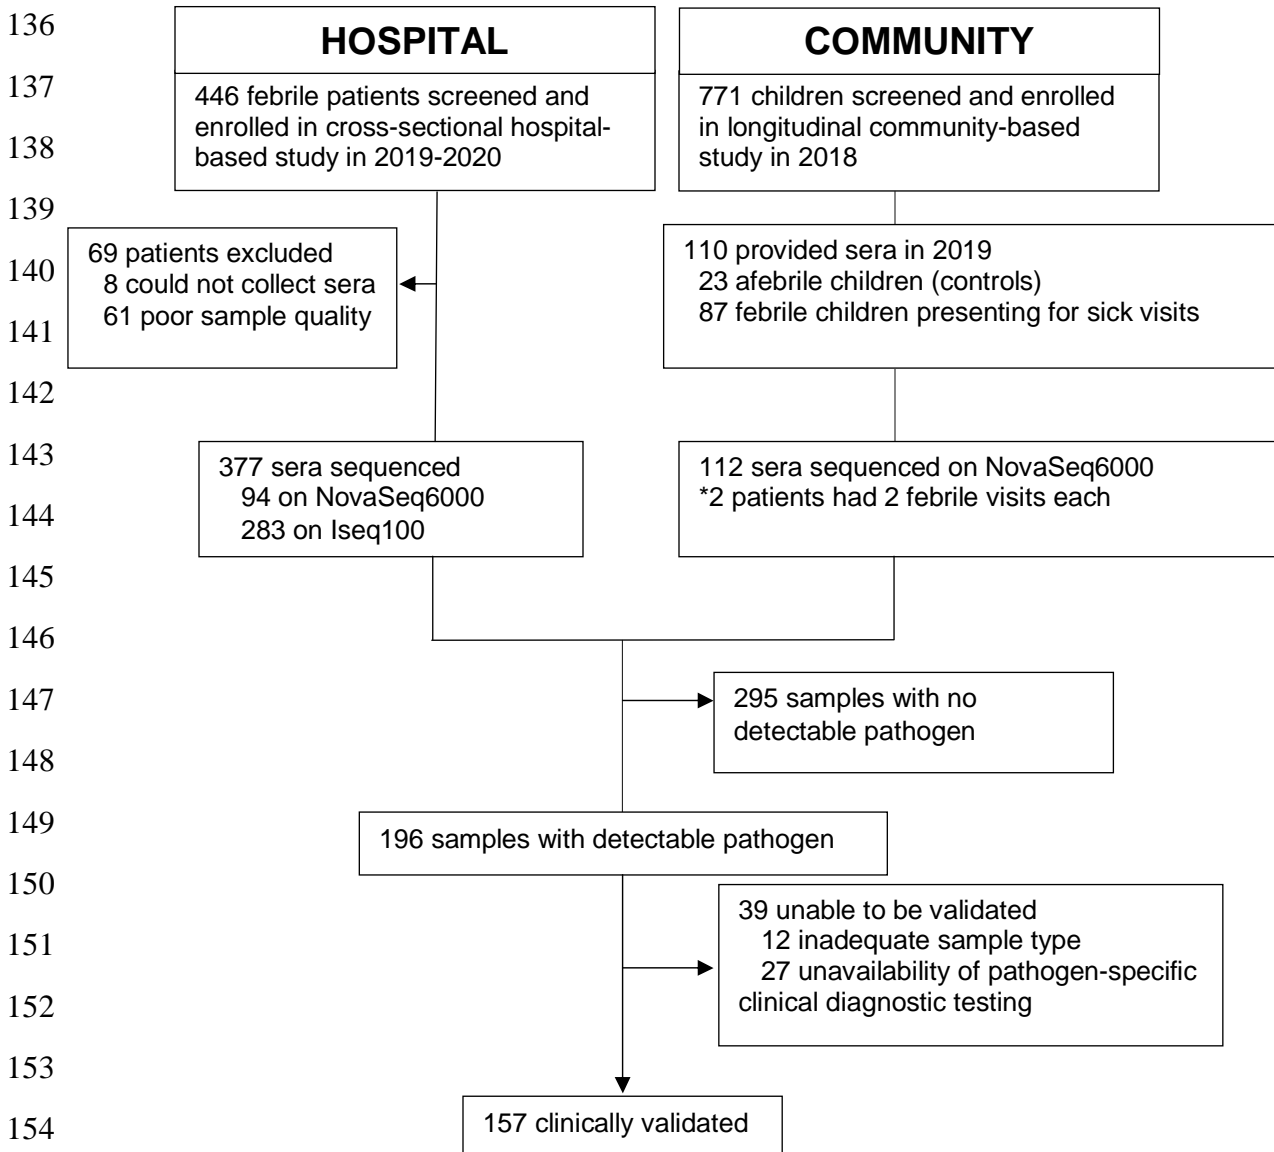

155  
156  
157 **Figure 1. Study flow chart.** Flow of enrolled febrile patients through two clinical studies defined as  
158 hospital (cross-sectional febrile patient hospital-based cohort) and community (longitudinal pediatric  
159 community-based cohort).

160  
161  
162  
163

164 **Table 1. Baseline demographic and clinical characteristics of cohort**

165

| Characteristic                      | Hospital  | Community  | Total      |
|-------------------------------------|-----------|------------|------------|
| n                                   | 377       | 110        | 487        |
| Male                                | 207, 54.9 | 56, 50.9   | 263, 54.0  |
| Age – years (median, IQR)           | 10, 12    | 6, 4       | 8, 10      |
| Year of fever                       |           |            |            |
| 2019                                | 196, 52.0 | 110, 100.0 | 306, 62.8  |
| Attends school                      | 146, 38.8 | 64, 58.2   | 210, 43.2  |
| Attends work                        | 75, 19.9  | 0,0.0      | 75, 15.4   |
| <b>Socioeconomic status</b>         |           |            |            |
| Very poor                           | 16, 4.3   | 0, 0.0     | 16, 3.3    |
| Lower                               | 178, 47.3 | 22, 20.0   | 200, 41.2  |
| Middle                              | 181, 48.1 | 88, 80.0   | 269, 55.3  |
| Upper                               | 1, 0.3    | 0, 0       | 1, 0.2     |
| <b>Risk factors</b>                 |           |            |            |
| Coil use (yes)                      | 225, 59.8 | 70, 63.6   | 295, 60.7  |
| Insecticide use (yes)               | 191, 50.8 | 60, 54.5   | 251, 51.6  |
| Larvicide use (yes)                 | 28, 7.4   | 27, 24.5   | 55, 11.3   |
| Net use (yes)                       | 313, 83.2 | 99, 90.0   | 412, 84.8  |
| Animal contact (yes)                | 275, 73.1 | N/A        | 275, 73.1  |
| Insect contact (yes) †              | 211, 56.1 | N/A        | 211, 56.1  |
| <b>Symptoms<sup>#</sup></b>         |           |            |            |
| Aching                              | 131, 34.7 | N/A        | 131, 34.7  |
| Chills                              | 167, 44.3 | N/A        | 167, 44.3  |
| Cough                               | 175, 46.4 | N/A        | 175, 46.4  |
| Headache                            | 236, 62.6 | 20, 17.9   | 256, 52.4  |
| Joint pain                          | N/A       | 1, 0.9     | 1, 0.9     |
| Mouth sores                         | 88, 23.3  | N/A        | 88, 23.3   |
| Muscle pain                         | N/A       | 4, 3.6     | 4, 3.6     |
| Runny nose                          | 66, 17.5  | N/A        | 66, 17.5   |
| Heart palpitations                  | 120, 31.8 | N/A        | 120, 31.8  |
| Rash                                | 81, 21.5  | 0, 0.0     | 81, 16.6   |
| <b>Clinical laboratory data</b>     |           |            |            |
| n                                   | 137       | 65         | 202        |
| WBC ( $10^{12}/L$ ), median, IQR    | 7, 5.6    | 6.8, 5.6   | 7, 5.6     |
| Lymphocyte %, median, IQR           | 30, 20    | 20, 20     | 30, 20     |
| Neutrophil %, median, IQR           | 70, 30    | 70, 20     | 70, 20     |
| Platelets ( $10^9/L$ ), median, IQR | 209, 140  | 250, 115.5 | 222, 137.5 |

166 These data are in n, % unless otherwise stated

167 †This question was specifically asked in the hospital study questionnaire but not in the community study

168 questionnaire.

169 #23 patients from Community Study did not have symptoms.

170 †Not all patients had complete blood counts because study physician decided based on clinical necessity.

171

172

173

174

175 **mNGS Characterization of the Pathogen Landscape in Febrile Cambodians**

176 The composite of identified pathogens in both cohorts is shown in Figure 2. Vector-borne disease was  
 177 the most prevalent clinical category for mNGS analysis of sera from febrile patients. This clinical category  
 178 included DENV (138/489), most abundant, followed by rickettsiae (13/489), CHIKV (10/489) and *P. vivax*  
 179 (6/489). The second highest clinical category was systemic viral illness notably including hepatitis and  
 180 pegiviruses (8/489).

181

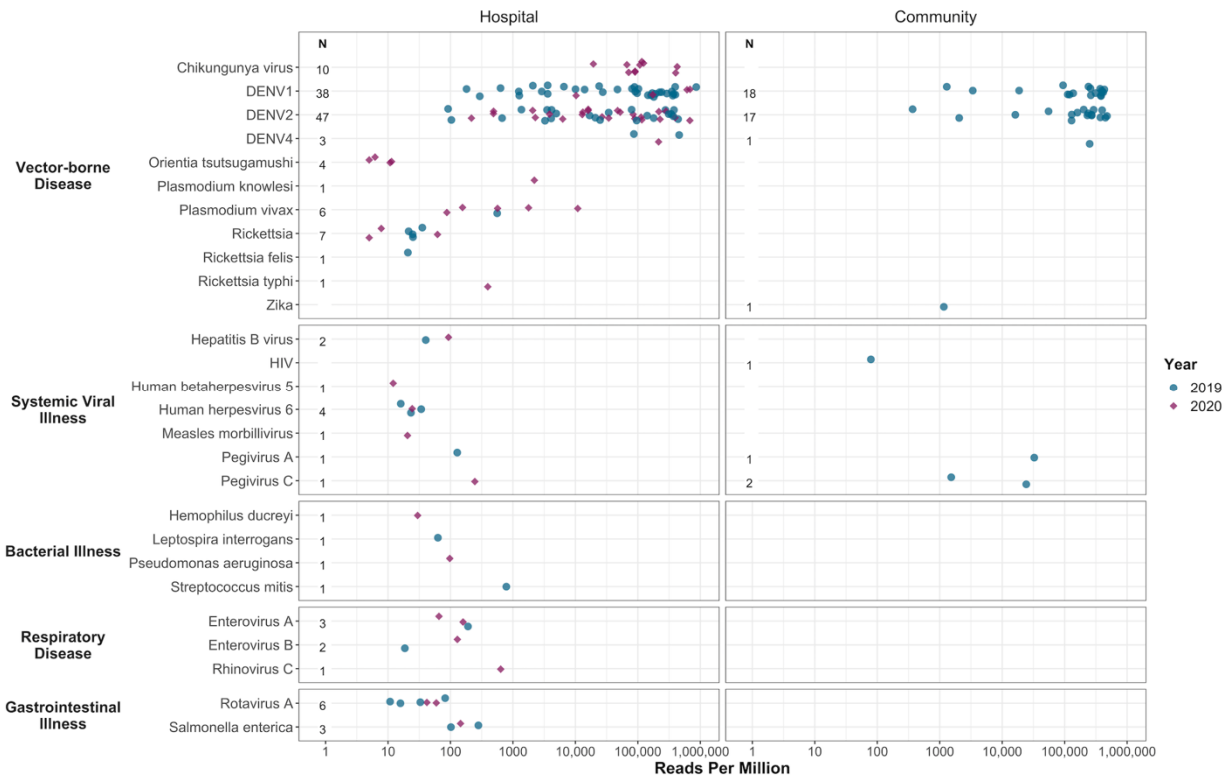

182

183 **Figure 2.** Microbial landscape identified from serum samples of febrile Cambodian  
 184 participants. Identified pathogens in sera by clinical category, reads per million, and study setting. Each  
 185 circle represents a pathogen in 2019 and each diamond a pathogen in 2020.  
 186  
 187

188

189 **Pathogen Serosurveillance Findings in Clinical and Regional Contexts**

190 Here, we describe select pathogens in greater detail pertinent to clinical and genomic epidemiology of the  
 191 Southeast Asian region.

192



193 *Dengue virus*

194 Dengue was responsible for the greatest disease burden in our study (138 DENV positive cases of 489  
195 febrile cases) due to the largest DENV outbreak documented in Cambodian history in 2019. The  
196 predominant DENV serotype of the outbreak in Kampong Speu province was DENV1 (Supplemental  
197 Table 2). 71% (48/67) of DENV1 sequences identified, aligned to DENV1, accession no. MF033254.1  
198 from 2016 DENV1 outbreak in Singapore. Phylodynamic analyses will be presented elsewhere.

199

200 *Rickettsia*

201 While rickettsial diseases are easily treated with oral doxycycline, the challenge is timely diagnosis and  
202 access to serological and/or molecular testing for confirmation. In Laos, a country of similar climate and  
203 socio-economic status as Cambodia, 7% (122/1871) of febrile patients were positive for scrub typhus, 1%  
204 murine typhus (10/1849) and 1% undetermined *Rickettsia spp.* combined with *Rickettsia felis* (9/1849)  
205 (21). Here, four patients were positive for *Orientia tsutsugamushi*, highly homologous to accession no.  
206 CP044031.1 from Zhejiang province, China and to accession no. LS398552.1 from Udon Thani, Thailand  
207 (22). mNGS identified one case of *Rickettsia felis*, one of *Rickettsia typhi* and seven cases of the genus  
208 *Rickettsia* without clinical confirmation of species-level data.

209

210 *Chikungunya virus*

211 In July 2020, we identified 10 cases of CHIKV in Kampong Speu Province where patients presented with  
212 symptoms of fever, rash, shaking chills and arthralgias. mNGS analysis revealed CHIKV as the clinical  
213 etiology after initial diagnoses of DENV were made based on patients' presenting symptoms. These  
214 sequences aligned closely with three Urban Asian Lineage (AUL) sequences from Thailand (accession  
215 nos. MN075149.1, MN630017.1 and MK468801.1). CHIKV PCR was then added to national surveillance  
216 and it was noted that the outbreak spread rapidly to 21 other provinces in Cambodia, affecting at least  
217 6,000 people by the end of September 2020 despite implementation of vector control (23).

218

219 *Zika virus*

220 ZIKV circulates at low levels in Thailand and Vietnam, however almost no active cases have been  
221 reported in Laos and Cambodia even during the global epidemic in 2015-16.(24, 25) Since 2010, only one  
222 prospective case of active ZIKV infection was detected in Cambodia, notably Kampong Speu  
223 province.(26) In the current study, sera from an otherwise asymptomatic school-aged female was  
224 positive for ZIKV with 20.1x coverage depth and 98.8% coverage breadth closely aligned with to  
225 accession no. MF996804.1, a Thai case of microcephaly, with 99.2% sequence similarity. These  
226 information indicate that ZIKV in Cambodia has regional sequence similarities to Thailand, possibly  
227 related to high cross-border traffic between the two countries despite little ZIKV detected in  
228 Cambodia.(27) Another possibility is a separate enzootic ZIKV transmission cycle maintained in non-  
229 human primates given recent evidence of ZIKV in stump-tailed macaques in Thailand (28).

230

231 *Plasmodium spp.*

232 Cambodia is in the pre-elimination stage for all malarial species with a specific goal to eliminate *P.*  
233 *falciparum* by 2025 (29). mNGS identified six cases of very low parasitemia (down to 16 parasites per uL)  
234 with *P. vivax*, initially missed on microscopy or rapid test. *P. vivax* has replaced *P. falciparum* as the most  
235 prevalent form of malaria in Southeast Asia, particularly in Cambodia where eradication liver-stage  
236 treatment of *P. vivax* with primaquine has not yet been widely adopted (4). mNGS also identified *P.*  
237 *knowlesi* in a forest worker, previously diagnosed with *P. malariae* using blood smear microscopy. This  
238 pathogen identification led to retrospective mNGS assessment of other *P. malariae* cases and the  
239 addition of *P. knowlesi* PCR to national surveillance. Given human encroachment and deforestation in  
240 Southeast Asia, there is ample opportunity for spread of zoonotic malaria, such as *P. knowlesi* typically  
241 found in non-human primates, that may endanger elimination goals (4).

242

243 *Leptospira interrogans*

244 Leptospirosis is an underappreciated health threat in Southeast Asia. In nearby Kampong Cham  
245 province, 2.5% (17/630) of all fevers in 27 rural to semi-rural villages were confirmed as acute  
246 leptospirosis infection via IgM serology and microagglutination testing (30). In November 2019, a school-  
247 aged female with a fever of 38.5°C presented with a headache and abdominal pain. mNGS identified

248 *Leptospira interrogans* at 62.9 rpM with 99.7% homology to CP048830.1. Due to limited in-country  
249 diagnostic testing, no further testing was performed, but clinical examination confirmed the presence of  
250 conjunctival effusion, a specific feature of leptospirosis.

251

#### 252 *HIV-1 and DENV co-infection*

253 A school-aged female of Vietnamese descent presented to the hospital with a 39°C fever and mNGS  
254 analysis revealed a possible coinfection of DENV2 and HIV. The low sequence coverage (14%) of a  
255 Vietnamese HIV genome, accession no. FJ185253.1, was likely due to the sequencing space used on the  
256 high number of DENV2 reads (DENV2: 368 rpM, 99% sequence coverage breadth and 17.1x depth  
257 versus HIV: 78.1 rpM, 14% coverage and 1x depth) for this sample (31). However, re-mapping all reads  
258 belonging to the *Lentivirus* genus resulted in a more comprehensive assessment with 33% coverage of  
259 the Vietnamese HIV-1 viral genome (accession no. FJ185246. 1) at a depth of 3.47x, with greatest  
260 homology to a Thai HIV-1 strain, accession no. LC114832.1, from a female sex worker. The mNGS  
261 results were confirmed by clinically validated HIV 1/2 antibody tests, and the patient subsequently  
262 initiated antiretroviral therapy.

263

#### 264 **Risk modeling of contracting vector-borne disease**

265 The probability of having a vector-borne infection was increased for individuals in the hospital study if the  
266 household owned a car, (OR 1.95, 95% 1.19–3.21) or if they were 5 to 18 years of age (for 5 to 10 years  
267 of age; OR 2.35, 95% CI (1.11–5.06); OR 2.68 for 10 to 18 years of age; 1.4–5.29) (Figure 3; Table 2). In  
268 the community cohort, living near surface flooding, using a Scaled Flooding Index (4-week lag),  
269 significantly increased the likelihood of vector-borne infection (OR 2.04, 95% CI 1.24–3.49) while larvicide  
270 use decreased the chances of acquiring a vector-borne disease (OR 0.32 95% CI 0.11–0.8).

271

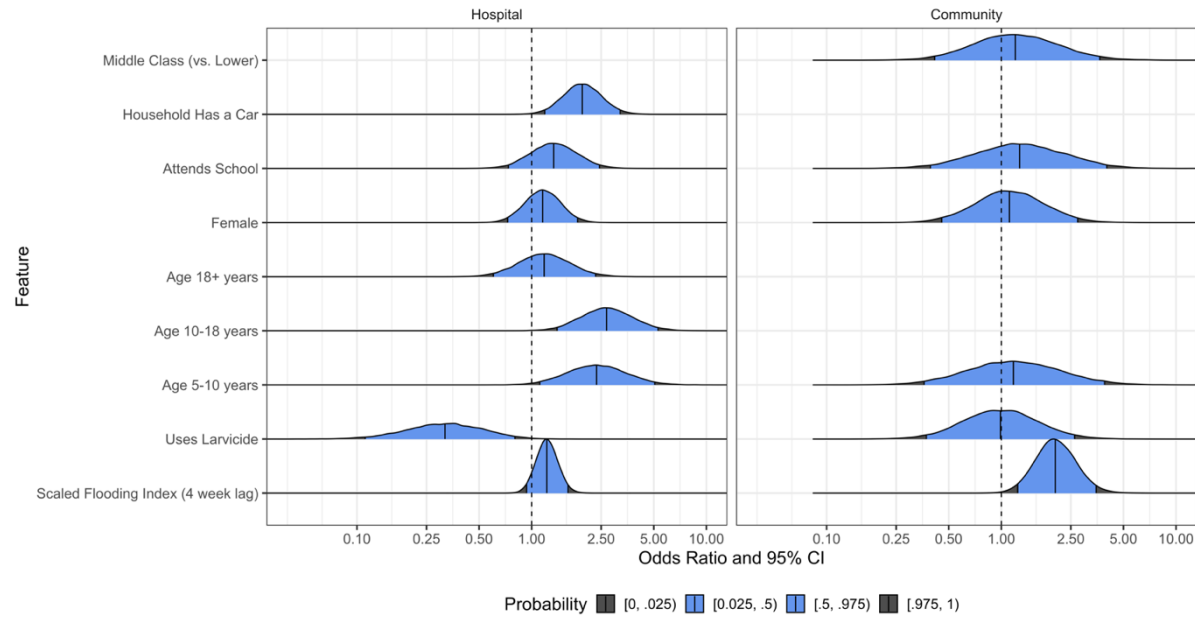

272

273 **Figure 3.** Probability of infection by vector-borne pathogen. Results of multivariate analyses in both  
 274 patient populations to identify risk factors of contracting vector-borne pathogens.  
 275

276 **Table 2.** Predictors for infection by vector borne versus non-vector-borne pathogens

| Risk Factors             |           | Hazard ratio | 95% CI      |
|--------------------------|-----------|--------------|-------------|
| Scaled flooding index    |           |              |             |
|                          | Hospital  | 1.22         | 0.94 - 1.61 |
|                          | Community | 2.04         | 1.24-3.49   |
| Uses larvicide           |           |              |             |
|                          | Hospital  | 0.32         | 0.11-0.8    |
|                          | Community | 0.99         | 0.37-2.63   |
| Age 5–10 years           |           |              |             |
|                          | Hospital  | 2.35         | 1.11-5.06   |
|                          | Community | 1.17         | 0.36-3.9    |
| Age 10–18 years          |           |              |             |
|                          | Hospital  | 2.68         | 1.4-5.29    |
|                          | Community | N/A          | N/A         |
| Age 18+ years            |           |              |             |
|                          | Hospital  | 1.18         | 0.6-2.32    |
|                          | Community | N/A          | N/A         |
| Female                   |           |              |             |
|                          | Hospital  | 1.16         | 0.73-1.83   |
|                          | Community | 1.11         | 0.46-2.74   |
| Attends school           |           |              |             |
|                          | Hospital  | 1.34         | 0.74-2.44   |
|                          | Community | 1.27         | 0.39-4.02   |
| Household has a car      |           |              |             |
|                          | Hospital  | 1.95         | 1.19-3.21   |
|                          | Community | N/A          | N/A         |
| Middle class (vs. lower) |           |              |             |
|                          | Hospital  | N/A          | N/A         |
|                          | Community | 1.2          | 0.42-3.66   |

277 Crop land was the predominant land cover type for participants' homes (89%; 426/476; Figure 4) with  
278 urban as the next most common (10%; 49/476). Urban participants were more likely to have non-vector  
279 borne diseases (13%; 4/30) than vector-borne pathogens (9%; 15/162); however, there were still  
280 participants from primarily urban areas with CHIK, DENV1, DENV2, or ZIKV infections (Supplemental  
281 Table 1). Interestingly, 92% (125/135) of DENV cases were from crop land (Supplemental Table 2).  
282 Formal analyses by each disease outcome were not pursued because of small overall counts.  
283 Exploratory univariate analysis of the EIs indicated that only the surface flooding index was associated  
284 with any of the disease outcomes (Figure S1).

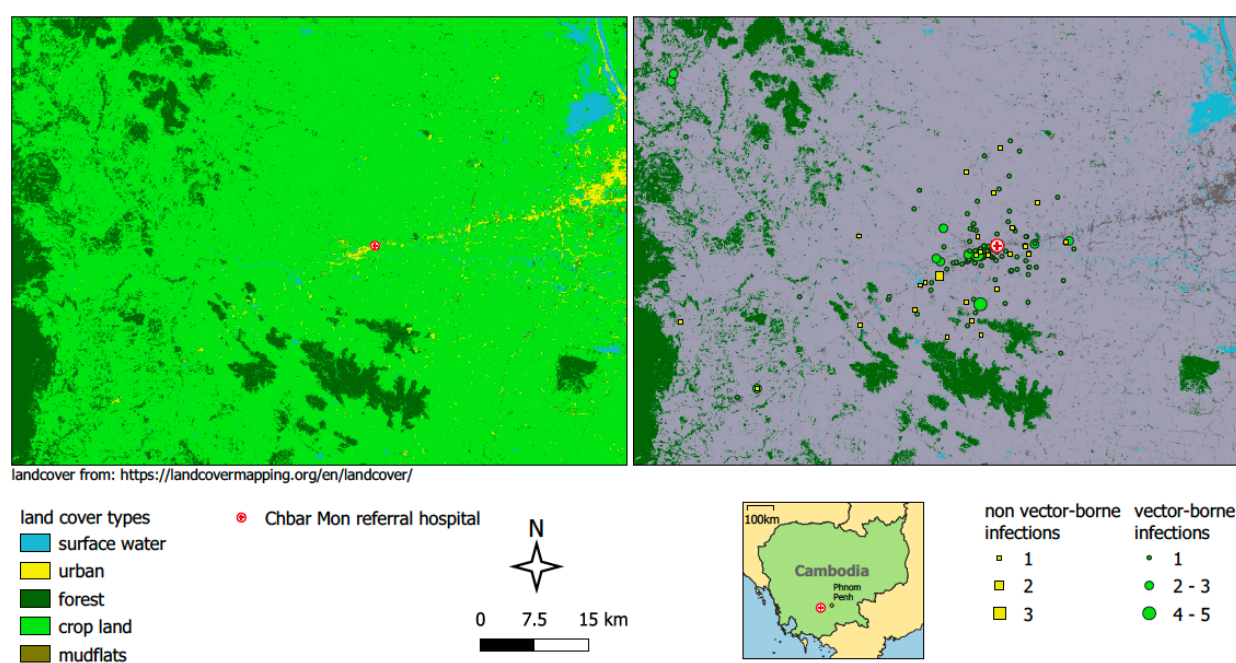

285  
286 **Figure 4.** Study site and land use map. Patient locations classified by land use and vector-borne disease  
287 status.  
288  
289

## 290 Discussion

291 Metagenomic NGS serosurveillance from peri-urban Cambodia revealed a diverse pathogen landscape,  
292 rich in underappreciated vector-borne and zoonotic pathogens, responsible for febrile disease. In this  
293 prospective, cross-sectional mNGS study, we identified common and confounding pathogens and  
294 demonstrated the feasibility and usefulness of a decentralized metagenomic sequencing pipeline. Despite  
295 challenges of actionable mNGS surveillance in a resource-scarce settings, we contributed to genomics-

296 informed pathogen epidemiology that is otherwise lacking in Cambodia and other similar settings, yet  
297 globally relevant given major demographic and socioeconomic shifts underway in the region that may  
298 increase the likelihood for disease epidemics (4, 32).

299 Our study provides a more granular analysis of changing pathogen dynamics than prior surveillance with  
300 pre-determined targeted diagnostics like PCR (5,33,34). The hierarchy of species abundance identified  
301 here is likely attributed to current malaria elimination campaigns, heterogenous socioeconomic  
302 development, and increased human migration (4, 35). DENV is now the most prevalent pathogen,  
303 particularly in children in comparison to neighboring countries, while malaria makes up a less substantial  
304 portion of febrile cases than in prior years where PCR-confirmed malaria infections was as high as 51.1%  
305 (754/1475) of febrile individuals presenting to peri-urban hospitals (5, 32).

306 Over the past two decades, the importance of vector-borne pathogens as drivers of epidemics and as  
307 emerging pathogens cannot be discounted despite current threats posed by novel respiratory pathogens.  
308 The detection of primarily vector-borne pathogens in this study is relevant as genomic surveillance  
309 becomes the foundation of global health security. The Asian strain of ZIKV evolved to enhance infectivity  
310 of humans and mosquitos via a single alanine-to-valine substitution that increased NS1 antigenemia,  
311 ultimately resulting in epidemics as early as 2007 in Micronesia and later in the Americas linked to  
312 microcephaly (36). Prior CHIK outbreaks were traced to a single mutation in 2005 allowing increased  
313 fitness of CHIK in *Aedes albopictus* mosquitos, and thus conferring epidemic potential of the virus in  
314 humans (37). Today, autochthonous CHIK transmission and outbreaks occur in increasingly warmer  
315 temperate zones like Europe (38). These two separate arboviral mutations, each responsible for  
316 devastating epidemics of global impact, highlight the importance of expanding genomic epidemiology and  
317 surveillance of vector-borne pathogens. Furthermore, mNGS recently identified novel vector-borne  
318 pathogens including the tick-borne flaviviruses like Alongshan and highly fatal mosquito-borne  
319 orthobunyaviruses like Cristoli, Umbre, and others (39–41). These emerging pathogens were identified in  
320 high-resource areas where clinical staff had access to mNGS technology. This further highlights the  
321 importance of real-time, in-country metagenomic investigation of potential pathogens of concern.  
322 Logistical and bureaucratic delays in shipping samples out of a country may translate to the  
323 establishment and spread of a pathogen in the interim.

324 To that end, timely contribution of pathogen genomic information from resource-limited settings is critical  
325 to the future success of pathogen identification based on genomic sequence data in an increasingly  
326 connected world, exemplified by GISAID and GENBANK during the SARS-CoV-2 pandemic (3). The lack  
327 of publicly available sequence data of clinically relevant pathogens, such as DENV and CHIK in  
328 Southeast Asia, is stark given the regional magnitude of infections by these pathogens.

329 Our mNGS surveillance primarily identified vector-borne pathogens; therefore, our risk models aimed to  
330 inform deductive algorithms for undifferentiated fevers in the region. Judicious use of mNGS surveillance  
331 would not entail sequencing every undifferentiated fever that is presumed to be dengue. With dengue  
332 being the most common diagnosis attributed to fevers in pediatric patients, we aimed to include  
333 demographic, behavior, and ecological data that might stratify risk of a vector-borne disease pathogen  
334 versus other pathogens in the hospital-based cohort of all ages. Exposure to animals and occupations did  
335 not stratify to any risk, but younger age, household car ownership (a surrogate of socioeconomic status)  
336 and absence of larvicide use led to increased risk of vector-borne diseases. Advances in land cover  
337 analysis now permit disease risk assessment of a population based on their environment. Here, living  
338 near surface flooding increased vector-borne disease risk, and surprisingly, DENV cases originated  
339 primarily in crop zones that often border urban zones, corroborating previous claims that DENV  
340 transmission in Southeast Asia is both rural and urban (42). Even with these tools to aid diagnostic  
341 algorithms, it is evident from our data that assigning microbial etiology to undifferentiated fever based on  
342 symptoms and demographic data is difficult given the presence of diverse pathogens, the shifting of  
343 socioeconomic patterns, and the ongoing transformation of land cover.

344 Limitations in the study included the sampling strategy of sera or whole blood alone, primarily for  
345 operational purposes in the early establishment of this pathogen mNGS detection pipeline. To that point,  
346 exclusive use of sera contributed to our pathogen detection rate of 40%, likely overestimating vector-  
347 borne pathogens to the detriment of respiratory and gastrointestinal pathogens. Since completion of the  
348 data analysis presented here, our mNGS monitoring efforts now include nasopharyngeal swabs in  
349 addition to ongoing blood sampling. To date, the addition of nasopharyngeal sampling to our mNGS  
350 surveillance study has led to timely recovery of entire SARS-CoV-2 genomes, with and without  
351 enrichment, for variant identification (43, 44). Fortunately, genome recovery of most viruses was

352 straightforward from sera, but sampling limitations remain for other taxa; for example, the optimal sample  
353 type to identify and speciate *Rickettsiae* is buffy coat, as opposed to sera, because the bacteria are  
354 intracellular (45). Other challenges included identification of less abundant bacterial pathogens,  
355 attributable to limited coverage offered by the iSeq, variable host contamination, different library  
356 preparation (e.g. DNA-based instead of RNA-based), and again, sample type. The cross-sectional study  
357 design limited our ability to see if a patient's clinical course evolved over a longer period of time, and the  
358 lack of blood culture capabilities at this hospital did not allow comparison of mNGS to standard diagnostic  
359 techniques for bacterial pathogen identification. However, we strived for actionable data, from either a  
360 clinical or public health standpoint, and succeeded in cases of *Plasmodium* spp., HIV, CHIK, and other  
361 pathogens. The cost of sequencing is declining while the efficiency of sequencing workflows is increasing,  
362 but mNGS analysis of pathogens is still more expensive than targeted diagnostics like PCR or culture (1).  
363 Until now, the majority of sequencing and analysis of biological samples collected in Cambodia and other  
364 resource-limited settings was outsourced to the Global North. To overcome challenges in reagent  
365 procurement, internet connectivity, and lack of advanced bioinformatics training, we built a robust  
366 infrastructure to mitigate these issues while also relying upon a pre-curated, rapid bioinformatics pipeline  
367 to build in-country expertise that allowed the entire sample collection, processing, and mNGS analysis to  
368 happen in a public Cambodian laboratory.

369 As a result, our ongoing, in-country metagenomic sequencing pipeline and capacity-building provides  
370 continuous monitoring of common and emerging pathogens for actionable interventions when possible.  
371 While the world looks to bolster real-time, genomics-informed pathogen surveillance networks to monitor  
372 COVID-19 variants and other emerging pathogens, challenges remain to establish critical "nodes" in  
373 biodiverse, resource-scarce areas (3, 46). Yet, as shown here, mNGS pathogen surveillance in these  
374 settings is feasible, revealing of diverse microbial landscapes, and paramount to the future of global  
375 health security.

376

## 377 **MATERIALS AND METHODS**

378 *Enrollment*



379 Participants living in Kampong Speu province, Cambodia, were eligible for enrollment in: 1) a longitudinal,  
380 community-based cohort of children, two to nine years of age (referred to as “community” and considered  
381 semi-active surveillance because study participants were told to notify study coordinator when they have  
382 a fever, called a “sick visit” that was considered nested cross-sectional timepoint within the longitudinal  
383 cohort); and 2) a cross-sectional hospital-based febrile cohort established in July 2019 (referred to as  
384 “hospital” and considered passive surveillance because patients first presented to the hospital with fever  
385 and were then asked to participate). Overall, participants were required to 1) be 6 months to 65 years of  
386 age; and 2) have a measured fever equal to or greater than 38°C in previous 24 hours (see  
387 [clinicaltrials.gov](https://clinicaltrials.gov) for full criteria). Demographics, clinical, and risk factor data was stored in a REDCAP®  
388 database. Locational data was collected using Garmin® GPS devices and Google Earth.

#### 389 *Sample collection and Nucleic Acid Extraction*

390 At enrollment, approximately 5 ml of whole blood was collected (except 2ml collected from those under 2  
391 years old). Sera was isolated and stored in cryovials with an equal volume of 2x DNA/RNA Shield (Zymo  
392 Research, Irvine, CA) at -20°C and transported from the Kampong Speu Hospital laboratory to the  
393 Cambodian National Center for Parasitology Entomology and Malaria Control (CNM) in Phnom Penh,  
394 Cambodia. Pathogen RNA was isolated from sera using Quick-RNA MicroPrep Kit (Zymo Research,  
395 Irvine, CA) and DNase-treated.

#### 396 *Library Preparation*

397 mNGS libraries were prepared from isolated pathogen RNA and converted to cDNA Illumina libraries  
398 using the NEBNext Ultra II RNA Library Prep Kit (New England BioLabs, Ipswich, MA). Human rRNA was  
399 depleted via FastSelect -rRNA HMR (Qiagen, Germantown, MD). ERCC Spike-In Controls  
400 (ThermoFisher, Waltham, MA) were used to indicate potential library preparation errors and to calculate  
401 input RNA mass. The initial samples (n=208) were sequenced on a NovaSeq6000 (Illumina, San Diego,  
402 CA) instrument as part of a pilot wet lab training at the Chan Zuckerberg BioHub in San Francisco, CA,  
403 and then the remainder of the study (n=279) was performed on an iSeq100 (Illumina) in Phnom Penh,  
404 Cambodia, using 150 nucleotide paired-end sequencing. Water controls were included in each library  
405 preparation.

#### 406 *Bioinformatic analysis*

407 Raw fastq files were uploaded to the IDseq portal, a cloud-based, open-source bioinformatics platform, to  
408 identify microbes from metagenomic data (<https://idseq.net>).<sup>(18)</sup> Potential pathogens were distinguished  
409 from commensal flora and contaminating microbial sequences from the environment by establishing a Z-  
410 score metric based on a background distribution derived from 16 non-template control libraries. Data  
411 were normalized to unique reads mapped per million input reads for each microbe at both species and  
412 genus levels. Taxa with Z-score less than 1, an average base pair alignment of less than 50 base pairs,  
413 an e-score less than 1e-10 and reads per million (rpM) less than 10 were removed from analysis.

#### 414 *Clinical validation*

415 Pathogens for which clinical testing capabilities were available in-country were validated to include RT-  
416 PCR of Hepatitis B, *Plasmodium spp.*, DENV, CHIK and ZIKV, serology of Human immunodeficiency  
417 virus (HIV) 1/2 antibodies or blood smear examination of *Plasmodium* infections by World Health  
418 Organization (WHO)-certified microscopists. Validation testing for other pathogens is underway or being  
419 developed. Samples were considered to have 'no pathogen hit' if they meet QA/QC standards but no  
420 resulting pathogenic organisms were identified with appropriate thresholds in place.

#### 421 *Spatial and environmental data*

422 Land cover data for Cambodia were downloaded from Open Development Cambodia  
423 (<https://opendevelopmentcambodia.net>). The data come from the Regional Land Cover Monitoring  
424 System at a resolution of 30 m by 30 m and were from 2016 (the most recent year we could find at this  
425 resolution). We used open-source satellite imagery (Google Earth) to ensure that the land cover data  
426 matched the reality on the ground. Participant village locations were then plotted on top of the land cover  
427 map. To summarize and quantify land cover types, we created 1km buffers around the geographic  
428 coordinates for participant villages and extracted land cover characteristics for each participant using the  
429 Zonal Histogram function in QGIS (version 3.16.5: <https://qgis.org>). We then categorized each participant  
430 according to the land cover type that predominated around their village location, and tabulated land cover  
431 types according to disease outcomes. Environmental indices (EI) for surface water and vegetation were  
432 extracted from Moderate Resolution Imaging Spectroradiometer (MODIS) products  
433 (MOD13Q1/MYD13Q1 250 meter AQUA/TERRA 16-day composites). A normalized flooding index  
434 (NDFI), the normalized differential vegetation index (NDVI), and the enhanced vegetation index (EVI)

435 were all extracted for this analysis.(19)(20) NDFI gives an indication of surface water, NDVI gives an  
436 indication of surface vegetation, and EVI is an improvement on NDVI in that it is less sensitive to  
437 atmospheric conditions and forest canopies. The data were downloaded for each 16-day time interval  
438 (from July 2018–May 2020) using a 1km buffer around the home of each patient in the dataset. The visit  
439 date of each participant was then used to align the EI values for each participant. EI values from the 16-  
440 day period leading up to a participant visit were used for analyses.

#### 441 *Statistical analysis*

442 The primary endpoint is identification of pathogen sequences via IDseq analysis in serum samples from  
443 febrile individuals treated at the Kampong Speu District Referral Hospital. On average, we found 25-40%  
444 of the monthly febrile cases were attributable to vector-borne disease. As such, we decided to determine  
445 which demographic variables, risk factors, and climate data were associated with vector-borne pathogen  
446 identification using a Bayesian logistic regression model. For our feature coefficients, we used a weakly  
447 informative prior and a MCMC sampler to determine the posterior distribution of the coefficients. We plot  
448 the marginal coefficient densities and display the posterior medians along with 95% credible intervals.  
449 We fit two separate models: one for the hospital cohort and one for the community cohort. Most, but not  
450 all, features are present in both models. More details about variable selection, model diagnostics, and  
451 model sensitivity may be found in the supplemental material.

#### 452 *Data Availability*

453 All genome sequence data from this study have been submitted to the NCBI Sequence Read Archive  
454 under Bioproject ID PRJNA681566. All protocols are uploaded on protocols.io and all bioinformatics code  
455 is available on <https://github.com>.

#### 456 *Ethics*

457 The study protocol was approved by the institutional review boards at the US National Institutes of Health  
458 and the National Ethics Committee on Human Research in Cambodia (NCT04034264 and NCT03534245  
459 on clinicaltrials.gov). All individuals provided informed consent. The guardians of all pediatric participants  
460 provided signed informed consent to participate in the study; and those aged 14 – 17 also provided  
461 assent in addition to parental consent.

#### 462 **Acknowledgements**

463 We thank patients and families of Kampong Speu District Referral Hospital who participated in this study.

464 We thank the Provincial Health Department of Kampong Speu province in Cambodia. We thank all the  
465 other employees at the Chan Zuckerberg Biohub and Chan Zuckerberg Initiative not listed in the author  
466 byline. We thank Brian Moyer and the NIAID Office of Cyberinfrastructure and Computational Biology  
467 (OCICB) for their assistance in improving the cyberinfrastructure of our Cambodian field sites.

#### 468 **Funding**

469 This research is supported by the Division of Intramural Research at the National Institute of Allergy and  
470 Infectious Diseases at the National Institutes of Health and the Bill and Melinda Gates Foundation [grant  
471 number OPP1211806]. The authors declare no competing interests.

472

#### 473 **References**

474

475 1. G. L. Armstrong, *et al.*, Pathogen Genomics in Public Health. *N. Engl. J. Med.* **381**, 2569–2580  
476 (2019).

477 2. X. Deng, *et al.*, Metagenomic sequencing with spiked primer enrichment for viral diagnostics and  
478 genomic surveillance. *Nat. Microbiol.*, 1–12 (2020).

479 3. J. L. Gardy, N. J. Loman, Towards a genomics-informed, real-time, global pathogen surveillance  
480 system. *Nat. Rev. Genet.* **19**, 9–20 (2018).

481 4. R. C. Christofferson, *et al.*, Current vector research challenges in the greater Mekong subregion for  
482 dengue, Malaria, and Other Vector-Borne Diseases: A report from a multisectoral workshop March  
483 2019. *PLoS Negl. Trop. Dis.* **14**, e0008302 (2020).

484 5. T. C. Mueller, *et al.*, Acute undifferentiated febrile illness in rural Cambodia: a 3-year prospective  
485 observational study. *PLoS One* **9**, e95868 (2014).

486 6. C.M. Farris *et al.* Rickettsial Disease: Important causes of undifferentiated Fever in Cambodia. 9th  
487 Tick Tick-Borne Pathog Conf Asia Pac Rickettsia Conf 2017; Cairns, Australia.

488 7. P. Parola, D. Musso, D. Raoult, Rickettsia felis: the next mosquito-borne outbreak? *Lancet Infect.*  
489 *Dis.* **16**, 1112–1113 (2016).

490 8. D. Prasetyo *et al.* Bartonellosis in Cambodia and Lao People's Democratic Republic. 9th Tick Tick-  
491 Borne Pathog Conf Asia Pac Rickettsia Conf 2017; Cairns, Australia.

492 9. S. Boyer, S. Marcombe, S. Yean, D. Fontenille, High diversity of mosquito vectors in Cambodian  
493 primary schools and consequences for arbovirus transmission. *PLOS ONE* **15**, e0233669 (2020).

494 10. J.-M. Reynes, *et al.*, Nipah Virus in Lyle's Flying Foxes, Cambodia. *Emerg. Infect. Dis.* **11**, 1042–  
495 1047 (2005).

- 496 11. Y. E. Raji, O. P. Toung, N. M. Taib, Z. B. Sekawi, A systematic review of the epidemiology of  
497 Hepatitis E virus infection in South – Eastern Asia. *Virulence* **12**, 114–129 (2021).
- 498 12. H. Auerswald, *et al.*, Serological Evidence for Japanese Encephalitis and West Nile Virus Infections  
499 in Domestic Birds in Cambodia. *Front. Vet. Sci.* **7** (2020).
- 500 13. M. R. Wilson, *et al.*, Clinical Metagenomic Sequencing for Diagnosis of Meningitis and Encephalitis.  
501 *N. Engl. J. Med.* **380**, 2327–2340 (2019).
- 502 14. W. Gu, S. Miller, C. Y. Chiu, Clinical Metagenomic Next-Generation Sequencing for Pathogen  
503 Detection. *Annu. Rev. Pathol.* **14**, 319–338 (2019).
- 504 15. T. Doan, *et al.*, Illuminating uveitis: metagenomic deep sequencing identifies common and rare  
505 pathogens. *Genome Med.* **8**, 90 (2016).
- 506 16. A. Ramesh, *et al.*, Metagenomic next-generation sequencing of samples from pediatric febrile illness  
507 in Tororo, Uganda. *PLOS ONE* **14**, e0218318 (2019).
- 508 17. S. Saha, *et al.*, Unbiased Metagenomic Sequencing for Pediatric Meningitis in Bangladesh Reveals  
509 Neuroinvasive Chikungunya Virus Outbreak and Other Unrealized Pathogens. *mBio* **10** (2019).
- 510 18. K. L. Kalantar, *et al.*, IDseq-An open source cloud-based pipeline and analysis service for  
511 metagenomic pathogen detection and monitoring. *GigaScience* **9** (2020).
- 512 19. Rouse J, Hass R, Monitoring the vernal advancement and retrogradation (Green wave effect) of  
513 natural vegetation. *NASA-CR-139243 Report No.: E74-10676*, 8–9 (1974).
- 514 20. M. Boschetti, F. Nutini, G. Manfron, P. A. Brivio, A. Nelson, Comparative Analysis of Normalised  
515 Difference Spectral Indices Derived from MODIS for Detecting Surface Water in Flooded Rice  
516 Cropping Systems. *PLOS ONE* **9**, e88741 (2014).
- 517 21. M. Mayxay, *et al.*, Causes of non-malarial fever in Laos: a prospective study. *Lancet Glob. Health* **1**,  
518 e46–e54 (2013).
- 519 22. S. D. Blacksell, *et al.*, Genetic typing of the 56-kDa type-specific antigen gene of contemporary  
520 *Orientia tsutsugamushi* isolates causing human scrub typhus at two sites in north-eastern and  
521 western Thailand. *FEMS Immunol. Med. Microbiol.* **52**, 335–342 (2008).
- 522 23. V. O. D. English, Chikungunya Spreads to 21 Provinces, Almost 6,000 Suspected Infected.  
523 *Cambodia Dly.* (2020) (March 16, 2021).
- 524 24. K. Ruchusatsawat, *et al.*, Long-term circulation of Zika virus in Thailand: an observational study.  
525 *Lancet Infect. Dis.* **19**, 439–446 (2019).
- 526 25. V. Duong, *et al.*, Low Circulation of Zika Virus, Cambodia, 2007–2016. *Emerg. Infect. Dis.* **23**, 296–  
527 299 (2017).
- 528 26. V. Heang, *et al.*, Zika Virus Infection, Cambodia, 2010. *Emerg. Infect. Dis.* **18**, 349–351 (2012).
- 529 27. T. Wongsurawat, *et al.*, Case of Microcephaly after Congenital Infection with Asian Lineage Zika  
530 Virus, Thailand. *Emerg. Infect. Dis.* **24** (2018).
- 531 28. D. Tongthainan, *et al.*, Seroprevalence of Dengue, Zika, and Chikungunya Viruses in Wild Monkeys  
532 in Thailand. *Am. J. Trop. Med. Hyg.* **103**, 1228–1233 (2020).

- 533 29. S. Siv, *et al.*, Plasmodium vivax Malaria in Cambodia. *Am. J. Trop. Med. Hyg.* **95**, 97–107 (2016).
- 534 30. S. Hem, *et al.*, Estimating the Burden of Leptospirosis among Febrile Subjects Aged below 20 Years  
535 in Kampong Cham Communities, Cambodia, 2007-2009. *PLoS ONE* **11** (2016).
- 536 31. H. Liao, *et al.*, Phylodynamic analysis of the dissemination of HIV-1 CRF01\_AE in Vietnam. *Virology*  
537 **391**, 51–56 (2009).
- 538 32. L. N. Chhong, *et al.*, Prevalence and clinical manifestations of dengue in older patients in Bangkok  
539 Hospital for Tropical Diseases, Thailand. *Trans. R. Soc. Trop. Med. Hyg.* **114**, 674–681 (2020).
- 540 33. M. R. Kasper, *et al.*, Infectious Etiologies of Acute Febrile Illness among Patients Seeking Health  
541 Care in South-Central Cambodia. *Am. J. Trop. Med. Hyg.* **86**, 246–253 (2012).
- 542 34. K. Chheng, *et al.*, A Prospective Study of the Causes of Febrile Illness Requiring Hospitalization in  
543 Children in Cambodia. *PLoS ONE* **8**, e60634 (2013).
- 544 35. Cambodian Ministry of Health, National strategic plan for elimination of malaria in the Kingdom of  
545 Cambodia 2011–2025.
- 546 36. Y. Liu, *et al.*, Evolutionary enhancement of Zika virus infectivity in Aedes aegypti mosquitoes. *Nature*  
547 **545**, 482–486 (2017).
- 548 37. K. A. Tsetsarkin, D. L. Vanlandingham, C. E. McGee, S. Higgs, A Single Mutation in Chikungunya  
549 Virus Affects Vector Specificity and Epidemic Potential. *PLoS Pathog.* **3**, e201 (2007).
- 550 38. F. Jourdain, *et al.*, From importation to autochthonous transmission: Drivers of chikungunya and  
551 dengue emergence in a temperate area. *PLoS Negl. Trop. Dis.* **14**, e0008320 (2020).
- 552 39. C. Rodriguez, *et al.*, Fatal Encephalitis Caused by Cristoli Virus, an Emerging Orthobunyavirus,  
553 France. *Emerg. Infect. Dis.* **26**, 1287–1290 (2020).
- 554 40. Z.-D. Wang, *et al.*, A New Segmented Virus Associated with Human Febrile Illness in China. *N. Engl.*  
555 *J. Med.* (2019) <https://doi.org/10.1056/NEJMoa1805068> (February 2, 2021).
- 556 41. P. Pérot, *et al.*, Identification of Umbre Orthobunyavirus as a Novel Zoonotic Virus Responsible for  
557 Lethal Encephalitis in 2 French Patients with Hypogammaglobulinemia. *Clin. Infect. Dis.* **72**, 1701–  
558 1708 (2021).
- 559 42. N. T. T. Pham, C. T. Nguyen, H. H. Vu, Assessing and modelling vulnerability to dengue in the  
560 Mekong Delta of Vietnam by geospatial and time-series approaches. *Environ. Res.* **186**, 109545  
561 (2020).
- 562 43. Manning JE *et al.*, Rapid metagenomic characterization of a case of imported COVID-19 in  
563 Cambodia. *bioRxiv* (2020) <https://doi.org/10.1101/2020.03.02.968818> (April 17, 2020).
- 564 44. , Severe acute respiratory syndrome coronavirus 2 isolate SARS-CoV-2/human/KHM/B117/2021,  
565 complete genome (2021) (June 9, 2021).
- 566 45. M. T. Robinson, J. Satjanadumrong, T. Hughes, J. Stenos, S. D. Blacksell, Diagnosis of spotted fever  
567 group Rickettsia infections: the Asian perspective. *Epidemiol. Infect.* **147** (2019).
- 568 46. , PM announces plan for 'Global Pandemic Radar.' *GOV.UK* (May 24, 2021).
- 569
